# Supplementary material for: Simultaneous detection of acetaminophen, catechol and hydroquinone using a graphene-assisted electrochemical sensor
Source: Royal Society of Chemistry journal article supplement (doi:10.1039/d2ra03900a), 2022-01-01
Supplement: d2ra03900a1.pdf [file d2ra03900a1.pdf]

## Supplemental Material

### Simultaneous detection of acetaminophen, catechol and hydroquinone using graphene-assisted electrochemical sensor

Guofang Wang<sup>1#</sup>, Siyi Zhang<sup>1#</sup>, Qinyu Wu<sup>1#</sup>, Jingzhi Zhu<sup>1</sup>, Suhua Chen<sup>3</sup>, Yuanyuan  
Lei<sup>1</sup>, Yanmei Li<sup>1</sup>, Haomin Yi<sup>1</sup>, Liyin Chen<sup>3</sup>, Zi-Qi Shi<sup>2\*</sup>, Yi Xiao<sup>1,4\*</sup>,

1. Key Laboratory of Study and Discovery of Small Targeted Molecules of Hunan Province, Department of Pharmacy, School of Medicine, Hunan Normal University, Changsha 410013, Hunan, China
2. Affiliated Hospital of Integrated Traditional Chinese and Western Medicine, Nanjing University of Chinese Medicine, Nanjing 210028, Jiangsu, China
3. Hunan Provincial Maternal and Child Health Care Hospital, Changsha 410008, Hunan, China
4. John A. Paulson School of Engineering and Applied Sciences, Harvard University, Cambridge, MA 02138, USA.

# These authors contributed equally to this work.

\*Corresponding authors. Email address: [njcpuxy4936@163.com](mailto:njcpuxy4936@163.com); [shiziqi47@126.com](mailto:shiziqi47@126.com).

## **Table of Content**

Table S1. Analytical results for separate determination of phenols

Table S2. Analytical results for simultaneous determination of phenols

Table S3. Recovery results for phenolic compounds at ITO/APTES/r-GO@Au electrode

Table S4. Drug content determined by HPLC method and EC method

Table S5 Comparison of analytical performance of phenolic compounds

Figure S1. Comparison of HPLC and EC method

Figure S2. Raman spectra of different electrodes

**Table S1 Analytical results for Phenols of ITO/APTES /r-GO@Au electrode**

Table S1 Analytical results for separate determination of phenols

| Phenols       | Fitting equation     | Dynamic range ( $\mu\text{M}$ ) | LOD ( $\mu\text{M}$ ) | LOQ ( $\mu\text{M}$ ) | R <sup>2</sup> |
|---------------|----------------------|---------------------------------|-----------------------|-----------------------|----------------|
| Acetaminophen | $Y=713.59+49.57 X$   | 1-500                           | 0.82                  | 2.73                  | 0.9844         |
| Catechol      | $Y=-1163.62+59.21 X$ | 5-500                           | 1.41                  | 4.71                  | 0.996          |
| Hydroquinone  | $Y=2023.84+67.05 X$  | 8-700                           | 1.95                  | 6.51                  | 0.9912         |

**Table S2. Analytical results for simultaneous determination of phenols**

Table S2 Analytical results for simultaneous determination of phenols

| Phenols       | Fitting equation    | Dynamic range ( $\mu\text{M}$ ) | LOD ( $\mu\text{M}$ ) | LOQ ( $\mu\text{M}$ ) | R <sup>2</sup> |
|---------------|---------------------|---------------------------------|-----------------------|-----------------------|----------------|
| acetaminophen | $Y=68.22 X+2325.89$ | 1-180                           | 0.12                  | 0.43                  | 0.997          |
| catechol      | $Y=75.50 X+2535.50$ | 5-140                           | 0.13                  | 0.42                  | 0.9949         |
| hydroquinone  | $Y=59.04 X+5721.67$ | 8-200                           | 0.11                  | 0.36                  | 0.9948         |

**Table S3 Recovery results for phenolic compounds at ITO/APTES /r-GO@Au**

**electrode**

Table S3 Recovery results for phenolic compounds at ITO/APTES /r-GO@Au

electrode

| Phenols       | Added ( $\mu\text{M}$ ) | Found ( $\mu\text{M}$ ) | Recovery (%) | RSD (%) |
|---------------|-------------------------|-------------------------|--------------|---------|
| Catechol      | 60                      | 63.86                   | 106.43       | 0.63    |
| Acetaminophen | 65                      | 68.86                   | 105.94       | 0.10    |
| Hydroquinone  | 88                      | 95.54                   | 108.57       | 0.31    |

**Table S4 Drug content determined by HPLC and EC**

| Samples       | HPLC                                 |                                          |         | EC                                   |                                          |         |
|---------------|--------------------------------------|------------------------------------------|---------|--------------------------------------|------------------------------------------|---------|
|               | Real concentration ( $\mu\text{M}$ ) | Detected concentration ( $\mu\text{M}$ ) | Content | Real concentration ( $\mu\text{M}$ ) | Detected concentration ( $\mu\text{M}$ ) | Content |
| Acetaminophen | 231.82                               | 200.33                                   | 86.42%  | 107.58                               | 85.62                                    | 79.59%  |

**Table S5 Comparison of analytical performance of phenolic compounds**

| Table S5 Comparison of analytical performance of phenolic compounds |                                                                           |                                    |                          |     |
|---------------------------------------------------------------------|---------------------------------------------------------------------------|------------------------------------|--------------------------|-----|
| Analyte                                                             | Methods                                                                   | Dynamic range<br>( $\mu\text{M}$ ) | LOD<br>( $\mu\text{M}$ ) | Ref |
|                                                                     | This work                                                                 | 1-500                              | 0.82                     |     |
| AP                                                                  | A flow injection chemiluminescence method                                 | 5 - 50                             | 1.8                      | 1   |
|                                                                     | A MIP electrochemical sensor                                              | 10 - 8000                          | 1                        | 2   |
|                                                                     | This work                                                                 | 5-500                              | 1.41                     |     |
|                                                                     | An expanded graphite electrode modified with intercalated montmorillonite | 10-1000                            | 1.13                     | 3   |
| CC                                                                  | Electrodeposited molecularly imprinted chitosan film on BDD electrodes    | 0-80                               | 0.69                     | 4   |
|                                                                     | This work                                                                 | 8-700                              | 1.95                     |     |
|                                                                     | MOF-rGO modified carbon paste electrode                                   | 4-1000                             | 0.66                     | 5   |
| HQ                                                                  | A nanometer cobalt/l-glutamate-modified electrode                         | 3.85-1300                          | 0.497                    | 6   |

**Figure S1 Comparison of HPLC and EC method**

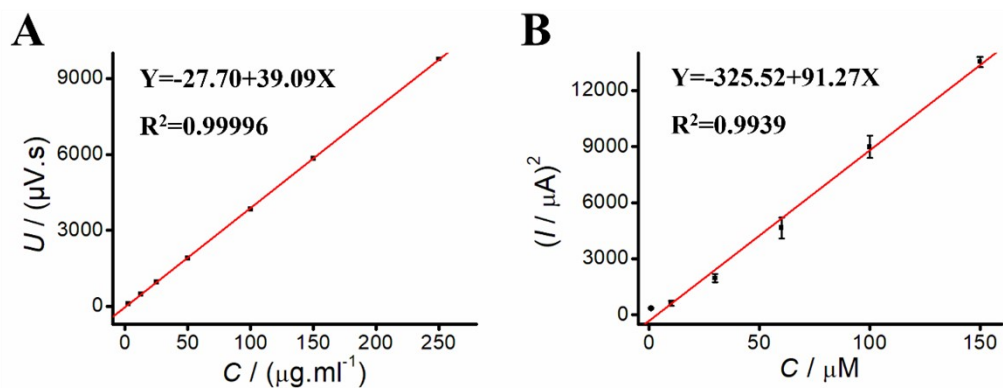

**Fig. S1. Comparison of HPLC and EC method.** A. Plot of various concentrations of AP vs peak area (HPLC). B. Plot of various concentrations of AP vs square of current (EC).



**Figure S2 Raman spectra of different electrodes**

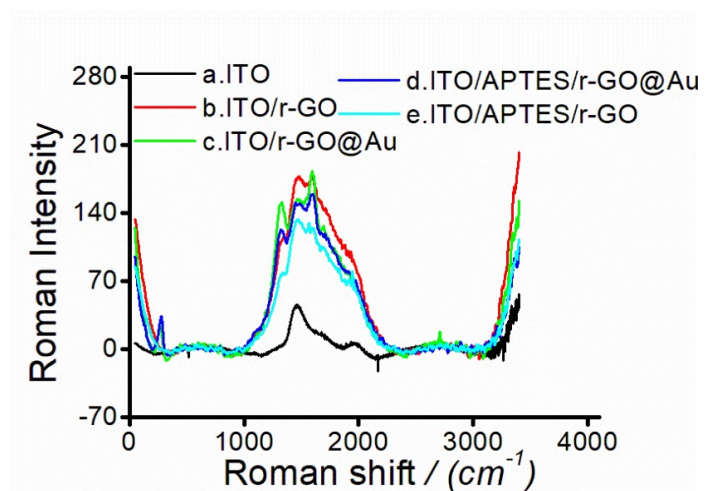

**Fig. S2. Raman spectra of electrodes.** Raman spectra of ITO glass, ITO/r-GO glass, ITO/r-GO@Au glass, ITO/APTES /r-GO glass and ITO/APTES / r-GO@Au glass electrodes.

## References

1. B. Hossein, *African Journal of Pharmacy and Pharmacology*, 2012, **6**.
2. X. Wang, J. Luo, C. Yi and X. Liu, *Electroanalysis*, 2013, **25**, 1907-1916.
3. Y. Kong, Y. Xu, H. Mao, C. Yao and X. Ding, *Journal of Electroanalytical Chemistry*, 2012, **669**, 1-5.
4. C. Salvo-Comino, I. Rassas, S. Minot, F. Bessueille, M. L. Rodriguez-Mendez, A. Errachid and N. Jaffrezic-Renault, *Mater Sci Eng C Mater Biol Appl*, 2020, **110**, 110667.
5. H. Wang, Q. Hu, Y. Meng, Z. Jin, Z. Fang, Q. Fu, W. Gao, L. Xu, Y. Song and F. Lu, *J Hazard Mater*, 2018, **353**, 151-157.
6. B. Huang, C. Yao, J. Yang, S. Du and X. Lu, *RSC Adv*, 2020, **10**, 43834-43839.
